# Supplementary material for: Identification and Characterization of Two Novel Noda-like Viruses from Rice Plants Showing the Dwarfing Symptom
Source: MDPI journal article supplement (doi:10.3390/v14061159), 2022-05-27
Supplement: s1 [file s1]

Supplementary Materials

# Identification and Characterization of Two Novel Noda-Like Viruses from Rice Plants Showing Dwarf Symptoms

**Table S1.** Primers used in this study.

| Primer                          | Sequence 5' > 3'                              |
|---------------------------------|-----------------------------------------------|
| Contig3-detection-F             | ATGGAGACGCCCAACTGATG                          |
| Contig3-detection-R             | TCTCCAACGCGATAGACAGC                          |
| Contig15-detection-F            | GCCCTAGCATATCAAGTCTC                          |
| Contig15-detection-R            | AATTATTTGTGTGCTGTATTTGATC                     |
| Contig3206-detection-F          | CCGTCGTGGACGTACCATAG                          |
| Contig3206-detection-R          | ACGAACCTGCTTGCGGTTTTTC                        |
| Contig15-5RACEGSP1-R            | GCATTGTGTGGTAATTCAGGG                         |
| Contig15-5RACEGSP2-R            | AGCCTGCTTCTTCGGCTATC                          |
| Contig15-5RACEGSP3-R            | GCTATCAACCCAGCGTAGCG                          |
| Contig3-5RACEGSP1-R             | GTGTAACCTAGGACGCGTTTCG                        |
| Contig3-5RACEGSP2-R             | GTTCGAAGTTGTTGGGGTCG                          |
| Contig3-5RACEGSP3-R             | CGGATGAAGTATGCGAAGAG                          |
| Contig15-3RACEGSP1-F            | GGGCACGTAAGGTGCTTGCG                          |
| Contig15-3RACEGSP2-F            | CAGCCGTCAGAAGTGGGGTA                          |
| Contig15-3RACEGSP3-F            | GCCCTAGCATATCAAGTCTC                          |
| Contig3-3RACEGSP1-F             | GAACGCCGAGCTGTGCAAG                           |
| Contig3-3RACEGSP2-F             | GTTTGGCTACGTGGTTGGTCC                         |
| Contig3-3RACEGSP3-F             | GCATAGAACCACATGCATGG                          |
| RNLV1 RNA1-Junction-F           | GGAAGCTACCGCAGAGAATG                          |
| RNLV1 RNA1-Junction-R           | GCGCAACACGACATCTAGGG                          |
| RNLV1 RNA2-Junction-F           | CGCAAGAAGGATAGAGCCGC                          |
| RNLV1 RNA2-Junction-R           | CCGAGCTCCATAGAGCTGTAC                         |
| RNLV1 RNA3-Junction-F           | CACTAACTAGTGAACGCTAGTGATAG                    |
| RNLV1 RNA3-Junction-R           | GGCTTGATTGTTGGTGAGCTG                         |
| RNLV1 RNA1-Full-F               | GATATATTATCTTTATTTTAAACAAATAATC               |
| RNLV1 RNA1-Full-R               | GCCGGTGTTAAAGTGAT                             |
| RNLV1 RNA2-Full-F               | GATATATTATCCTATTAACATGCCTAGACGC               |
| RNLV1 RNA2-Full-R               | GCCAGTACATGGGGGTTTA                           |
| Contig3545-5RACEGSP1-R          | GACGAGCGCACGGTTCTCCATATTCGTC                  |
| Contig3545-5RACEGSP2-R          | GGGCGAGTCATCATCGATGGAACGATGG                  |
| Contig3206-5RACEGSP1-R          | AGAAGTGCCCAGGGGAGTACTCCC                      |
| Contig3206-5RACEGSP2-R          | TGATCCGCTGGTATGACGAGGCGAATCG                  |
| Contig3206-5RACEGSP3-R          | ACGACCCATGGCAACGGGCGCTGACGTC                  |
| Contig3545-3RACEGSP1-F          | CGGACCACCGCGACGTCCTTCCAGGA                    |
| Contig3545-3RACEGSP2-F          | AAGTAGCGCAGAAGGTGGAGGAGCTGCT                  |
| Contig3545-3RACEGSP3-F          | AGGTGGTGGCGTTCTCAAGGGGGAGGA                   |
| Contig3206-3RACEGSP1-F          | ATATTAGTAAGTACCCCCGACCCCGCGG                  |
| Contig3206-3RACEGSP2-F          | CTTCCCTAACGACCCCGAGGCGTTAAAC                  |
| RNLV2 RNA1-Full-F               | GGTTTTGTACTTTCTCTGTGTTG                       |
| RNLV2 RNA1-Full-R               | ACCGTTCTAAATAGAAAATAATAATTC                   |
| RNLV2 RNA2-Full-F               | GGTATTGTTTTCCCCATAACATCGTG                    |
| RNLV2 RNA2-Full-R               | AGAAATTTCTAATGTCCGGTCCAG                      |
| pGD-RNLV1 B2-F                  | tacaaatctatctctggatccATGAACAAAACAATCAACATGGCG |
| pGD-RNLV1 B2-R                  | gtttgaacgagctctgtcgacCTATTCCGAATCATCATTCTCGTG |
| pGD-RNLV2 B2-F                  | tacaaatctatctctggatccATGAACAAAACAATCAACATGGCG |
| pGD-RNLV2 B2-R                  | gtttgaacgagctctgtcgacCTATTCCGAATCATCATTCTCGTG |
| pGR106-RNLV1 B2-F               | tcagcaccagctagcatcgatATGAACAAAACAATCAACATGGCG |
| pGR106-RNLV1 B2-R               | aaccgttcacgcggtcgacCTATTCCGAATCATCATTCTCGTG   |
| pGR106-RNLV2 B2-F               | tcagcaccagctagcatcgatATGCCGTGCGACATACGAGCA    |
| pGR106-RNLV2 B2-R               | aaccgttcacgcggtcgacCTACAACGAAAAGCAATAAAGCGC   |
| pCB301-RNLV1 RNA1-F             | tttcattggagaggATATATTATCTTTATTTTAAACAAATAATC  |
| pCB301-RNLV1 RNA1-R             | atgccatgccgacccGCCGGTGTTAAAGTGAT              |
| pCB301-RNLV1 RNA1-B2 backbone-F | TAGATCAAATACAGCACACAAATAATTTTC                |

|                                    |                                                        |
|------------------------------------|--------------------------------------------------------|
| pCB301-RNLV1 RNA1-B2 backbone-R    | TTCCGAATCATCATTCTCGTGC                                 |
| pCB301-RNLV1 RNA1-B2:GFP-F         | ACGAGAATGATGATTTCGGAAATGGTGAGCAAGGGCGACG               |
| pCB301-RNLV1 RNA1-B2:GFP-R         | TGTGTGCTGTATTGTACTTGTACAGCTCGTCCATGCC                  |
| pCB301-RNLV1 RNA1-ORF1a backbone-F | ATGAACAAAACAATCAACATGGCG                               |
| pCB301-RNLV1 RNA1-ORF1a backbone-R | TGGTTATAAGTTGAAAAGGTTAATAGTGAA                         |
| pCB301-RNLV1 ORF1a opt-F           | ACCTTTTCAACTTATAACCAATGAAATCTAACATGAAGATCATGTGG        |
| pCB301-RNLV1 ORF1a opt-R           | ATGTTGATTGTTTTGTTTCATTGATATGAACGGCCTCGATTACC           |
| pCB301-RNLV1 RNA2-F                | ttcatttggagaggATATATTATCCTATTAACATGCCTAGACGC           |
| pCB301-RNLV1 RNA2-R                | atgccatgccgacccGCCAGTACATGGGGGTTTA                     |
| RNLV1 RNA1 592-F                   | GAAGAACACGTAGCAGCTGA                                   |
| RNLV1 RNA1 592-R                   | CTCGTGCGGTAGCTTCCCTT                                   |
| T7-RNLV1 RNA1-F                    | GATCACTAATACGACTCACTATAGATATATTATCTTTATTTTAAACAAATAATC |
| T7-RNLV1 RNA1-R                    | GCCGGTGTAGAGTGATATATTA                                 |
| T7-RNLV1 RNA2-F                    | GATCACTAATACGACTCACTATAGATATATTATCTTATTAACATGCCTAG     |
| T7-RNLV1 RNA2-R                    | GCCAGTACATGGGGGTTTAAATA                                |
| RNLV1 RNA1 422-F                   | ACCCTAGATGTCGTGTTGCG                                   |
| RNLV1 RNA1 422-R                   | GCAGAAATTTGGGTGGCTGTG                                  |
| RNLV1 RNA2 509-F                   | TTGCAGATCAGGGACGAGTG                                   |
| RNLV1 RNA2 509-R                   | ACTTTGGTCAGAGCCTGGTG                                   |
| pET-28a-RNLV1 CP-F                 | cagcaaatgggtcgcggtaccATGCCTAGACGCAACAAGTCAA            |
| pET-28a-RNLV1 CP-R                 | tgcgccgcaagctgtcgacTTAGCGATATATTATCCGGTTAGTCC          |
| pFASTBAC-RNLV1 CP-F                | cccaccatcgggcgcggtaccATGCCTAGACGCAACAAGTCAA            |
| pFASTBAC-RNLV1 CP-R                | gcgactagtgcgtcgacTTAGCGATATATTATCCGGTTAGTCC            |
| RNLV1 CP N480A-F                   | CTGATTACgcTGAGCGTAACAAGCTCTGGGGGA                      |
| RNLV1 CP N480A-R                   | TACGCTCAgcGTAATCAGCAGGCCATGCATGTG                      |
| pGD-RNLV1 CP-F                     | tacaaatctatctggtaccATGCCTAGACGCAACAAGTCAA              |
| pGD-RNLV1 CP-R                     | gtttgaacgagctctgtcgacTTAGCGATATATTATCCGGTTAGTCC        |

**Table S2.** Summary of conserved domain prediction of capsid proteins from RNLV1, RNLV2, and other related viruses.

| Protein Accession No. | Virus Species                             | Host     | Family                     | Genus                         | Domain Accession    | Domain                  | Region           |
|-----------------------|-------------------------------------------|----------|----------------------------|-------------------------------|---------------------|-------------------------|------------------|
| NC_004144             | Flock House virus                         | Insect   | <i>Nodaviridae</i>         | <i>Alphanodavirus</i>         | cl03372             | Peptidase_A6            | 53-363           |
| NC_002691             | Nodamura virus                            | Insect   | <i>Nodaviridae</i>         | <i>Alphanodavirus</i>         | cl03372 (pfam01829) | Peptidase_A6            | 42-355           |
| NC_008041             | Redspotted grouper nervous necrosis virus | Fish     | <i>Nodaviridae</i>         | <i>Betanodavirus</i>          | cl29941             | Viral_coat              | 1-338            |
| NC_003449             | Striped jack nervous necrosis virus       | Fish     | <i>Nodaviridae</i>         | <i>Betanodavirus</i>          | cl29941 (pfam11729) | Viral_coat (Capsid-VNN) | 1-340            |
| EF137180              | Penaeus vannamei nodavirus                | Shrimp   | <i>Nodaviridae</i>         | Unclassified                  | cl29941             | Viral_coat              | 99-197           |
| MT270123              | Covert mortality nodavirus                | Shrimp   | <i>Nodaviridae</i>         | Unclassified                  | cl29941             | Viral_coat              | 19-228           |
| HM030973              | Santeuil virus                            | Nematode | <i>Nodaviridae</i>         | Unclassified                  | cl29941             | Viral_coat              | 2-178            |
| HM030971              | Orsay virus                               | Nematode | <i>Nodaviridae</i>         | Unclassified                  | cl29941             | Viral_coat              | 10-220           |
| KJ632943              | Mosinovirus                               | Insect   | <i>Nodaviridae</i>         | Unclassified                  | cl04161             | Peptidase_A21           | 190-442          |
| KR003800              | Lutzomyia nodavirus                       | Insect   | <i>Nodaviridae</i>         | Unclassified                  | cl04161             | Peptidase_A21           | 66-558           |
| NC_035466             | Lake Sinai virus 1                        | Insect   | <i>Sinhaliviridae</i>      | <i>Sinaivirus</i>             | cl04161             | Peptidase_A21           | 87-318; 437-505  |
| NC_035467             | Lake Sinai virus 2                        | Insect   | <i>Sinhaliviridae</i>      | <i>Sinaivirus</i>             | cl04161             | Peptidase_A21           | 392-460          |
| NC_010712             | Chronic bee paralysis virus               | Insect   | Unclassified               | Unclassified                  | cl24918 (pfam16506) | virion glycoprotein     | 273-348          |
| NC_001990             | Nudaurelia capensis beta virus            | Insect   | <i>Alphatetraviridae</i>   | <i>Betatetraviridae</i>       | cl04161             | Peptidase_A21           | 1-536            |
| NC_038335             | Nudaurelia capensis omega virus           | Insect   | <i>Alphatetraviridae</i>   | <i>Omegatetravirus</i>        | cl04161             | Peptidase_A21           | 1-570            |
| NC_014126             | Providence virus                          | Insect   | <i>Carmotetravirus</i>     | <i>Alphacarmotetravirus</i>   | cl04161             | Peptidase_A21           | 54-679           |
| NC_003412             | Euprosterna eleasa virus                  | Insect   | <i>Permutotetraviridae</i> | <i>Alphapermutotetravirus</i> | cl04161             | Peptidase_A21           | 201-694          |
| NC_043231             | Thosea asigna virus                       | Insect   | <i>Permutotetraviridae</i> | <i>Alphapermutotetravirus</i> | cl04161             | Peptidase_A21           | 201-695          |
| ON260789              | Rice-associated noda-like virus 1         | Plant    | Unclassified               | Unclassified                  | cl04161             | Peptidase_A21           | 113-289; 329-480 |
| ON260787              | Rice-associated noda-like virus 2         | Plant    | Unclassified               | Unclassified                  | cl29941             | Viral_coat              | 91-260           |

|           |                                            |        |              |              |         |               |        |
|-----------|--------------------------------------------|--------|--------------|--------------|---------|---------------|--------|
| MK533153  | Tetranychus urticae-associated nodavirus 2 | Insect | Unclassified | Unclassified | cl04161 | Peptidase_A21 | 8-257  |
| NC_033308 | Hubei noda-like virus 9                    | Insect | Unclassified | Unclassified | cl04161 | Peptidase_A21 | 16-280 |

**Table S3.** Viruses used for protein homology and phylogenetic analyses.

| Virus Species                             | RdRp Accession No. | CP Accession No. |
|-------------------------------------------|--------------------|------------------|
| Black beetle virus                        | NC_001411          | NC_002037        |
| Boolarra virus                            | NC_004142          | NC_004145        |
| Flock House virus                         | NC_004146          | NC_004144        |
| Nodamura virus                            | NC_002690          | NC_002691        |
| Pariacoto virus                           | NC_003691          | NC_003692        |
| Barfin flounder nervous necrosis virus    | NC_013458          | NC_013459        |
| Redspotted grouper nervous necrosis virus | NC_008040          | NC_008041        |
| Striped jack nervous necrosis virus       | NC_003448          | NC_003449        |
| Tiger puffer nervous necrosis virus       | NC_013460          | NC_013461        |
| Macrobrachium rosenbergii nodavirus       | AY231436           | AY222840         |
| Penaeus vannamei nodavirus                | HQ259079           | EF137180         |
| Covert mortality nodavirus                | MT270124           | MT270123         |
| Wuhan nodavirus                           | AY962576           | DQ233638         |
| Le Blanc virus                            | JQ943578           | JQ943579         |
| Santeuil virus                            | HM030972           | HM030973         |
| Orsay virus                               | HM030970           | HM030971         |
| Mosinovirus                               | KJ632942           | KJ632943         |
| Lutzomyia nodavirus                       | KR003799           | KR003800         |
| Bat guano associated nodavirus            | HM228873           | -                |
| Lake Sinai virus 1                        | NC_035466          | NC_035466        |
| Lake Sinai virus 2                        | NC_035467          | NC_035467        |
| Chronic bee paralysis virus               | NC_010711          | NC_010712        |
| Nudaurelia capensis beta virus            | NC_001990          | NC_001990        |
| Helicoverpa armigera stunt virus          | NC_001981          | NC_001982        |
| Dendrolimus punctatus virus               | NC_005898          | NC_005899        |
| Nudaurelia capensis omega virus           | -                  | NC_038335        |
| Providence virus                          | NC_014126          | NC_014126        |
| Euprosteria elaeasa virus                 | NC_003412          | NC_003412        |
| Thosea asigna virus                       | NC_043232          | NC_043231        |

-, sequences not available.

**Table S4.** Summary of RNA-seq.

| Project | Total Reads (150 nt) | Mapping Genome | Non-host Reads | Assembled Contigs (> 200 nt) |
|---------|----------------------|----------------|----------------|------------------------------|
| 2016-ZJ | 62,652,118           | Oryza sativa   | 4,587,386      | 49,035                       |
| 2019-SH | 78,856,691           | Oryza sativa   | 5,898,480      | 52,647                       |

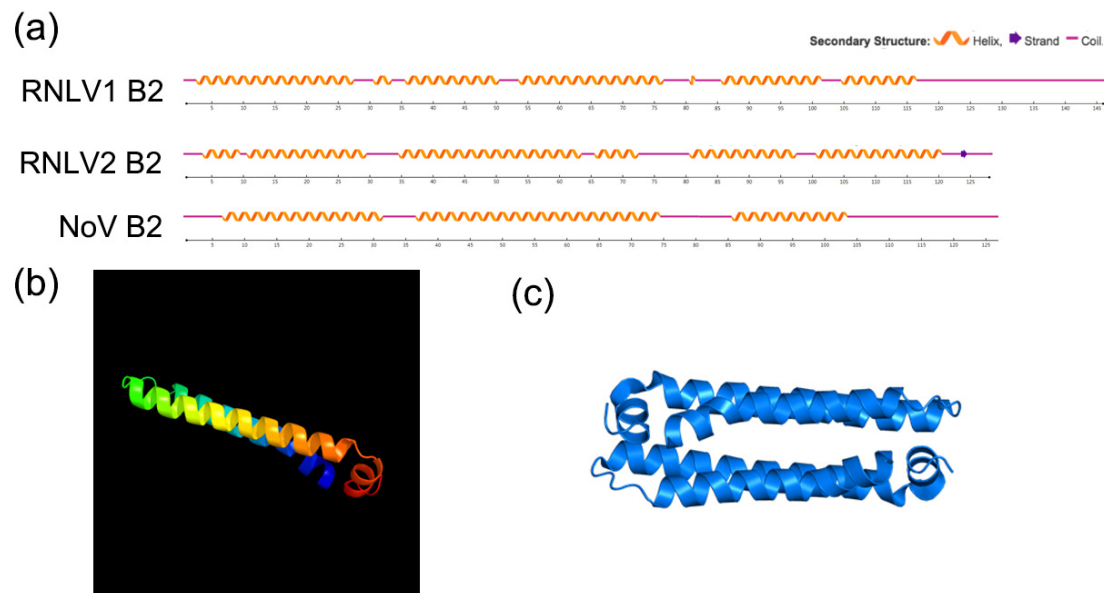

**Figure S1.** Protein Structure of RNLV1 and RNLV2 B2 proteins (a) Predicted secondary structure of B2 proteins of RNLV1, RNLV2, and NoV using SurfP2.0. (b) Predicted protein model of RNLV2 B2 generated by Phyre2 based on the NoV B2 model by Phyre2.0. The model of NLRV2 B2 was coloured by rainbow N - C terminus (purple-red). (c) Model of Nov B2 dimer (3g80) from the Protein Data Bank (PDB).

ATGAAATCTAACATGAAGATCATGTGGTCCAAAAGGCCGAAGCTAGACAAACTGGAGTGCTCCGTCATTACG  
 CTTGATGTGGTTCTAAGGAGCTACGAGAGGTATTGCTACGGCAACCCAAAGCAAGCCCCTAGCCTAACACGT  
 TTCCTGAGGATGTTGACAGATCTGACACTCGTTGGATTGACCGTAAGGCGCCTTTCACGCTTCTTGGACAATG  
 GAATTATCGCAAACGTCGAGGACTTCGTACCAATCGGACACAGAAAGCCAACCATCTACGAGAAGTTCATG  
 ATGGTTGTACAACGTCGCTACGCTGGGTTGATAGCGTACGTTCTACGTATCCTGGGGAAGTACAACATCTGCA  
 ATGTTAGTATGTTGATCGAGAAGGCAACTACACGCAACCCCTGATTTACGTAAGGACTTATTGCGTACGACCTC  
 ACAGATACGTGCTTTCCCGATGGTCAGCGCTGGTATTCACAGCCACCCAAACTCTGCCATGTGGCGATCAGCA  
 ATGGCGGCACACATGAACAAGATAGCCGAAGAAGCAGGCTACATACCATAACAACGTCTCGAAATCAGCTAA  
 TGATAATGTTGGTACAAGATACTTCTACTTCATGAAAGATCTTGACAGAAAGTACGAAGACCCTGAATTACCA  
 CACAATGCAGCTATCATCATGACTGATGTTGATTACTATGCCGATATGAATGCATGGTTACTCACAGAGAAAC  
 CAATCTTGATCTATACTCTCTATCCTACTACAGCAGCTCATAGGAACGATGAGTACTCATTCTACATCGATCC  
 AGCTACGAATTCAGTGGTCTACAACGTATCAGGAGGTGCTAAGTATCAGCACCACCTATGGGACTACAAGGG  
 TGATACTATCGGAACATTCGACCGCAAGTGGGACTTGATCACTTACTCAATCGAACAACGGAAGATCGCAGG  
 TGACGAGAACCACAGGTTTCATCCTCCTATGTCCAGTGGCCAAGGTACACCACCCATACGGCTTCCTCGTCGGT  
 ACTGGAGCTTGGGGACTACAACGGCGAGACTTGACCAGTGGTTACTTGTACGATGACATCACCGACCAGTTG  
 TCGATCTTAGTTAGTGAGCAACATTCAGTAGAGATCACTGGCACTTTGTACGAATCAATCAAGCAACGATTGC  
 TGAACAAGACAGCATCACCATTTGGTCTCTGACATTGAACGCCTGTTGCGAGACAACAAGGTGACAGAACAC  
 GCTCTGATTGCACCCTTGCTATACAATCACATGGGACTAGAGTTACATCGTAACGTGGTCCACACAACAACAT  
 TGACCACTAACTACCATCCCCTTGAACCTGGCGCTCTTGCTACCGAAGATGGTAAACCAGGAGGTGAAGCAG  
 GACACACGACGCTTGCAATCCAGGCGCTTGCTTCCCAACAGTAAGCGAAGCAAGTGACATCTCAACAGTCA  
 TACACCGGCTTCTCAAGCCTTGCAACACCATTACTCCACCTCGCATCTACAACAACATATGCCGATGAATTCAG  
 GAAGATCTTACTGATGGGAAAGGAACGTATGGGTGCCCCATGGAGTTACCCCCAAGTCATTGCTGAACAGAA  
 TGGCCCTCTACAACGAGTACGAATCGACCAGATCCGACACACCGTAATGCTCAATTCTCCGAACCGTAACAG

TGCCTTCGTCAAGAACGAAGCGTATCCAACATCAACGCACCACGGAACATCACCACAATGTCGGGAGAGG  
TAACGTTGAGTCTCTCCAGCTTCACGTACCCCTTCAAGCACGAGATCTTGAAGAACCACAAGACTAAGTTCTA  
CTCACCAGGCATGTCACCAATCGAGATCACAGAACGACTAGCCGAACTGACAACCACAGATGGTGTAATAG  
CCACTGATTACACAAAGTTTGATGGCTCCATATCACAATGGCTGCAACTGTTTCGTCAAGAACAACATATACAGC  
TTGGCTAGATCAGAGATACGTAGGTGAGTTCGAACACTGGTTCAATCAGGTGTTTCGTCCAAAGGGCTCGTACT  
AAACATGGAGTGCAGTACAATCCTCATTGGTCAACACGCAGTGGAAGCCCACTCACAACATGATGGGAATACT  
CAGATAAATGCTTTTGTGTCTACTGCGCCCTCCGCAAACCTGAAATACGAGCCCAAAGAGTCGTTTCAGCAAG  
CTCGGCCTCTACTGTGGTGATGATGGTTATACACGCTACTATCCCGGTCTCGACCTCATGATGACAACAGTTG  
CGAAGGAACTCGGCCTTACCCCTTGATATTGAGGTGAACTTCCACGGGCGGTACAGCTTTTGTGGTAGACGGTT  
CATAGATCCATCACGTATTCCTGACAGCTATCAAGACATAAAGAGAACTCTGCCGAAGTTGCATCTGGTACG  
TAATGGGACCATGTCAATTGCACAGAGATTGACGAACAAGGCTGTTGGATACCAGACAACCGACGACAAGA  
CGCCCATCATCGGTAACCTGGGCACGTAAGGTGCTTGCGTTAACAGGATTGCAACCCAGAACTTGTCTCATG  
AAGAAGCTTACAAGATGAATCAACCATGGCCTCAAGAATCTGAACTTGAAATCGAAGAACACGTAGCAGCT  
GACTTGGAGATCACTAGTCAAGAACTTAAGCAACTATGCGACTACATTGATCAGACTACATCACTAGATGAC  
TTTCCAATCCTGTTTGAATGGACACCTGATGCTAAGATAACAGCCGTCAGAAGTGGGGTAATTGAGGCCGTTT  
ATATTAATGAACAAAACAATCAACATGGCGGAAAACGTGATCAAAGCACTTCAAGACCAAGTCGACAAGCT  
CAAGATGGCAGAAGACAAAGGCGATCTACGTCAGCTACCAACAATCAAGCCGAACTACTGGTCGCCCCACT  
CGCAATGGCTACAGGGGGTTCCAGGAGCCCTAGCATATCAAGTCTCAGCTCTAACCAAACGAGCCCAGAAAT  
TCAACGCAAAGCGCGTGGCGCTAGGGCTAGAAGCAAACGAATTGGACACTTCAGTGATCCTGAACTTGCAAT  
ACGCCCTGACAGCAGCGATAGTCGGAGCCAACCGGGACGGGTTAATAATGATGTTAGCACCCTCTTTCGAG  
AGGAACCCTCGTGCTCTCACGAACCCCAAAGCAGCAAATCCAAACGAAGGTTTGGGAAGCTACCGCACGAG  
AATGA

**Figure S2.** Sequences of optimized RNLV1 ORF1a.

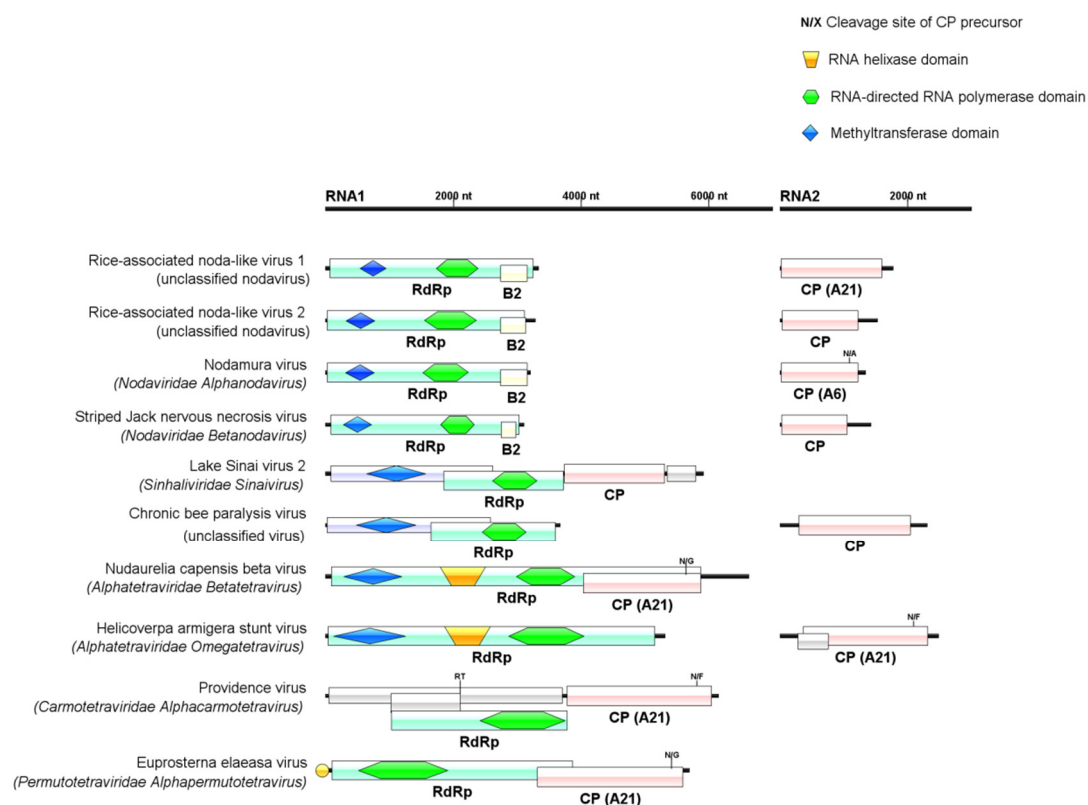

**Figure S3.** Genome and encoded protein comparisons of RNLV1, RNLV2 and related virus representatives. The name and current taxonomy of the viruses were listed on the left. Viral genome is represented by black lines. Viral proteins are represented by colored rectangles and predicted domains (by CD Search) are represented by other shapes. Viral proteins from different genera and domains that function identically are marked in the same color.
